# Supplementary material for: The Use of Antidepressants, Anxiolytics, Sedatives and Hypnotics in Europe: Focusing on Mental Health Care in Portugal and Prescribing in Older Patients
Source: PubMed Central journal article supplement (PMC7699589; doi:10.3390/ijerph17228612), 2020-11-19
Supplement: ijerph-17-08612-s001.pdf [file ijerph-17-08612-s001.pdf]

## Supplementary material

**Table S1.** Drugs corresponding to each ATC code.

| ATC Code                       | ATC code/Drug name                |
|--------------------------------|-----------------------------------|
| N05B                           | N05BA01 diazepam                  |
|                                | N05BA02 chlordiazepoxide          |
|                                | N05BA03 medazepam                 |
|                                | N05BA04 oxazepam                  |
|                                | N05BA05 potassium clorazepate     |
|                                | N05BA06 lorazepam                 |
|                                | N05BA07 adinazolam                |
|                                | N05BA08 bromazepam                |
|                                | N05BA09 clobazam                  |
|                                | N05BA10 ketazolam                 |
|                                | N05BA11 prazepam                  |
|                                | N05BA12 alprazolam                |
|                                | N05BA13 halazepam                 |
|                                | N05BA14 pinazepam                 |
|                                | N05BA15 camazepam                 |
|                                | N05BA16 nordazepam                |
|                                | N05BA17 fludiazepam               |
|                                | N05BA18 ethyl loflazepate         |
|                                | N05BA19 etizolam                  |
|                                | N05BA21 clotiazepam               |
|                                | N05BA22 cloxazolam                |
|                                | N05BA23 tofisopam                 |
|                                | N05BA24 bentazepam                |
|                                | N05BA56 lorazepam, combinations   |
|                                | N05BB01 hydroxyzine               |
|                                | N05BB02 captodiame                |
|                                | N05BB51 hydroxyzine, combinations |
|                                | N05BC01 meprobamate               |
|                                | N05BC03 emylcamate                |
|                                | N05BC04 mebutamate                |
|                                | N05BC51 meprobamate, combinations |
| N05BD01 benzoctamine           |                                   |
| N05BE01 buspirone              |                                   |
| N05BX01 mephexalone            |                                   |
| N05BX02 gedocarnil             |                                   |
| N05BX03 etifoxine              |                                   |
| N05BX04 fabomotizole           |                                   |
| N05BX05 Lavandulae aetheroleum |                                   |
| N05C                           | N05CD08 midazolam                 |
|                                | N05CF03 zaleplon                  |
|                                | N05CF04 eszopiclone               |
|                                | N05CH01 melatonin                 |
|                                | N05CH03 tasimelteon               |
|                                | N05CM18 dexmedetomidine           |
| N06A                           | N06AB03 fluoxetine                |
|                                | N06AB04 citalopram                |
|                                | N06AB05 paroxetine                |
|                                | N06AB06 sertraline                |
|                                | N06AB08 fluvoxamine               |
|                                | N06AB10 escitalopram              |
|                                | N06AX11 mirtazapine               |
|                                | N06AX12 bupropion                 |
|                                | N06AX16 venlafaxine               |
|                                | N06AX17 milnacipran               |
|                                | N06AX18 reboxetine                |
|                                | N06AX21 duloxetine                |
|                                | N06AX22 agomelatine               |
|                                | N06AX26 vortioxetine              |
| N06AX27 esketamine             |                                   |

Table S2. Autocorrelation tests output (N05B, N05C, and N06A).

| Dependent Variable | R    | R Square | Adjusted R Square | Durbin-Watson |
|--------------------|------|----------|-------------------|---------------|
| N05B               | .954 | .910     | .905              | 1.043         |
| N05C               | .566 | .320     | .280              | .558          |
| N06A               | .994 | .989     | .988              | .424          |

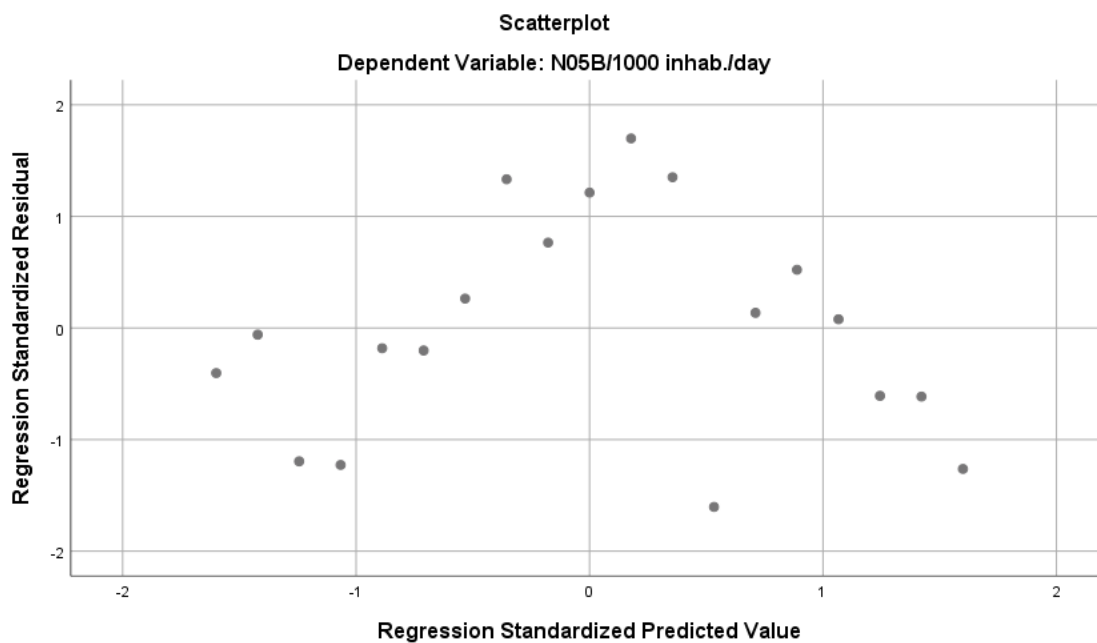

Figure S1. Linearity test output (zresid\*zpred) - N05B.

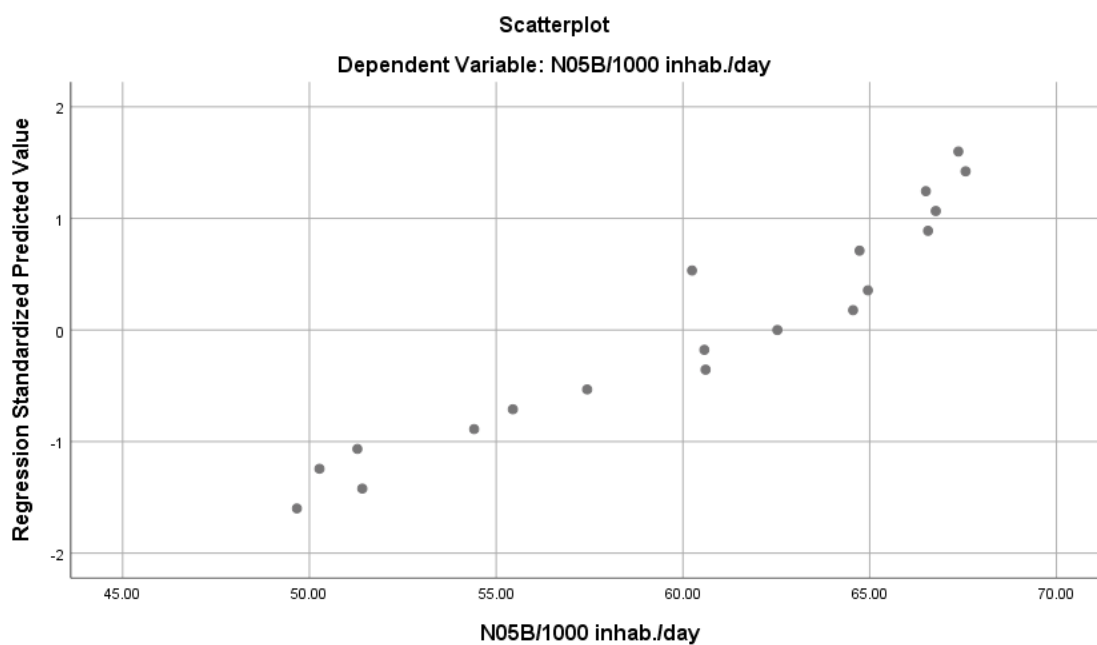

Figure S2. Linearity test output (zpred\*dependnt) - N05B.

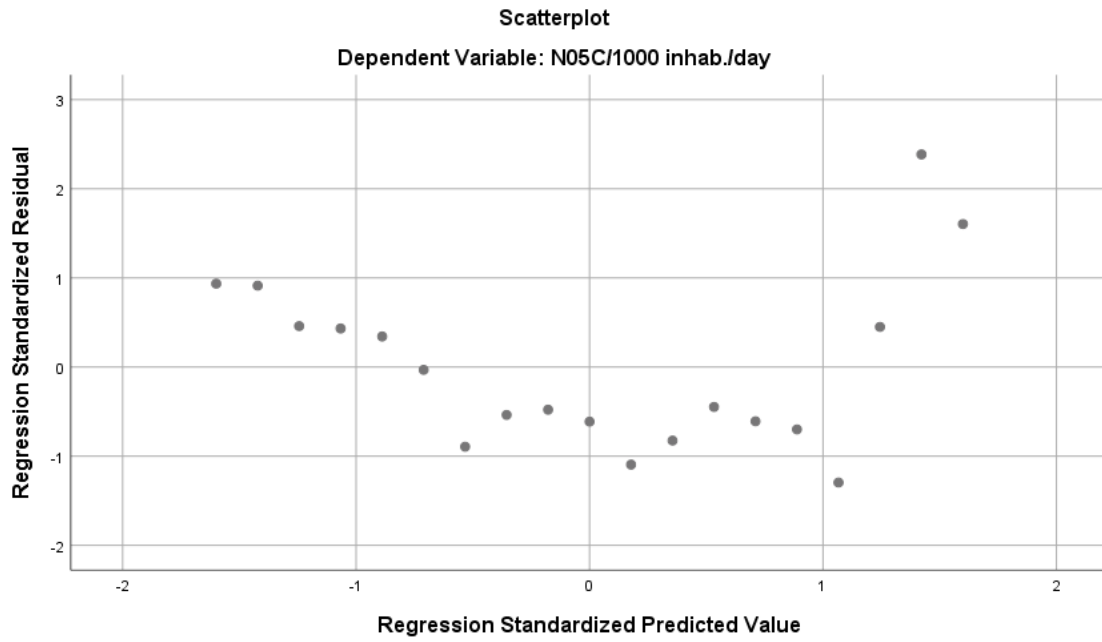

**Figure S3.** Linearity test output (zresid\*zpred) - N05C.

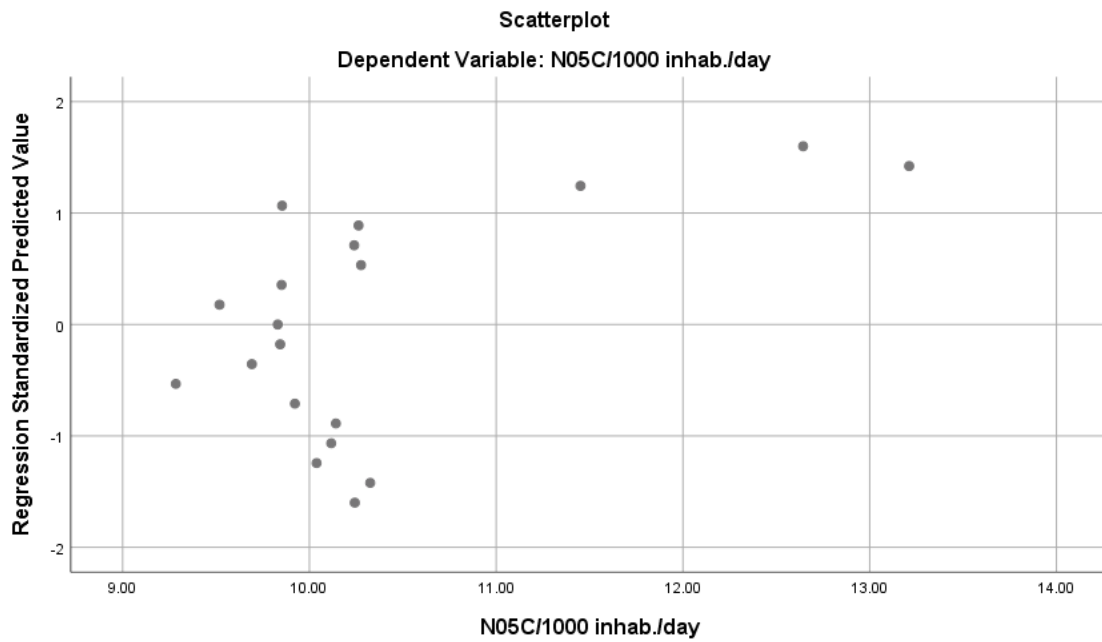

**Figure S4.** Linearity test output (zpred\*dependnt) - N05C.

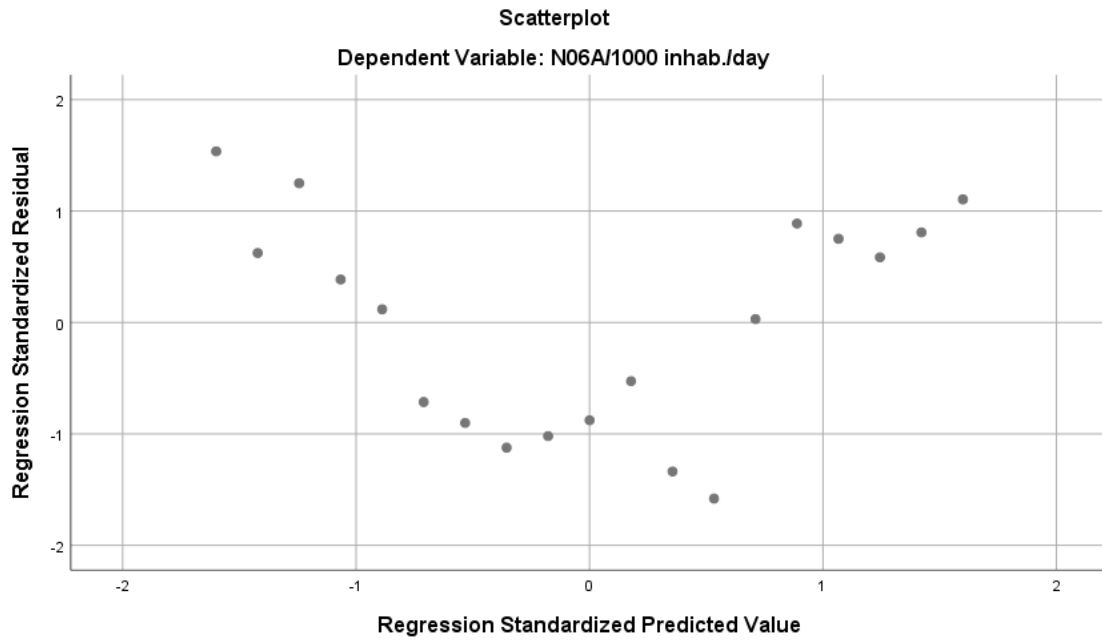

Figure S5. Linearity test output (zresid\*zpred) - N06A.

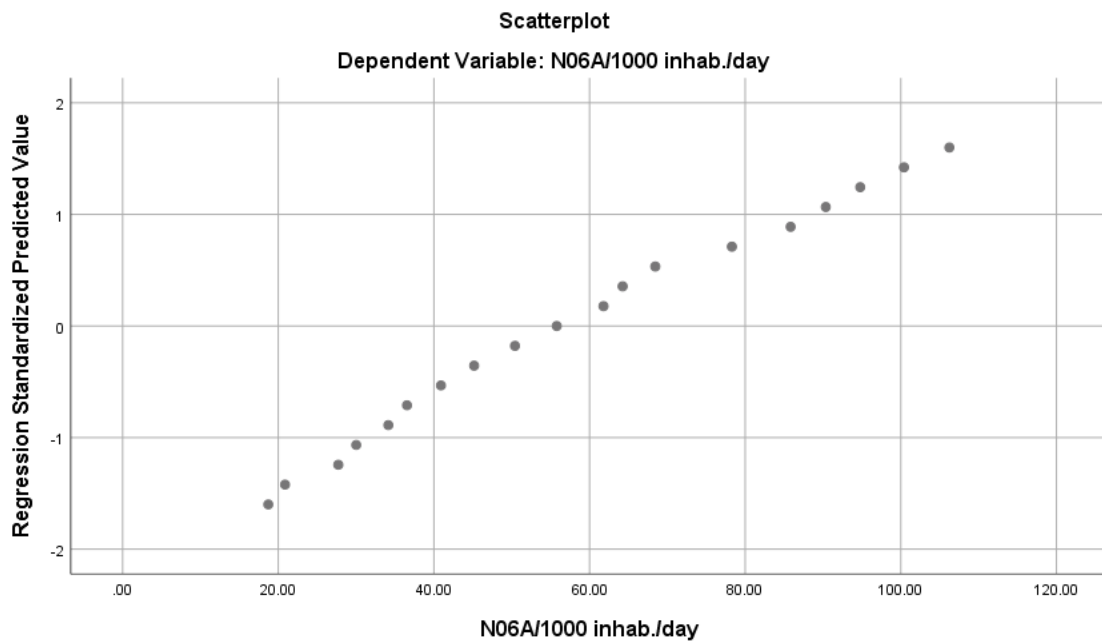

Figure S6. Linearity test output (zpred\*dependnt) - N06A.

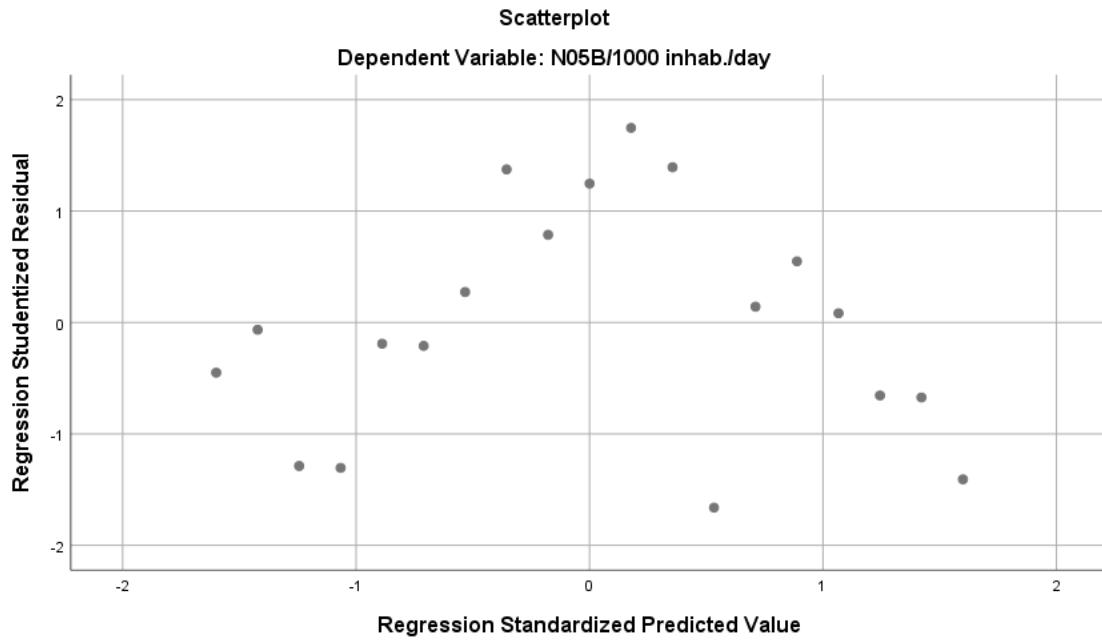

Figure S7. Homocedasticity test output (sresid\*zpred) - N05B.

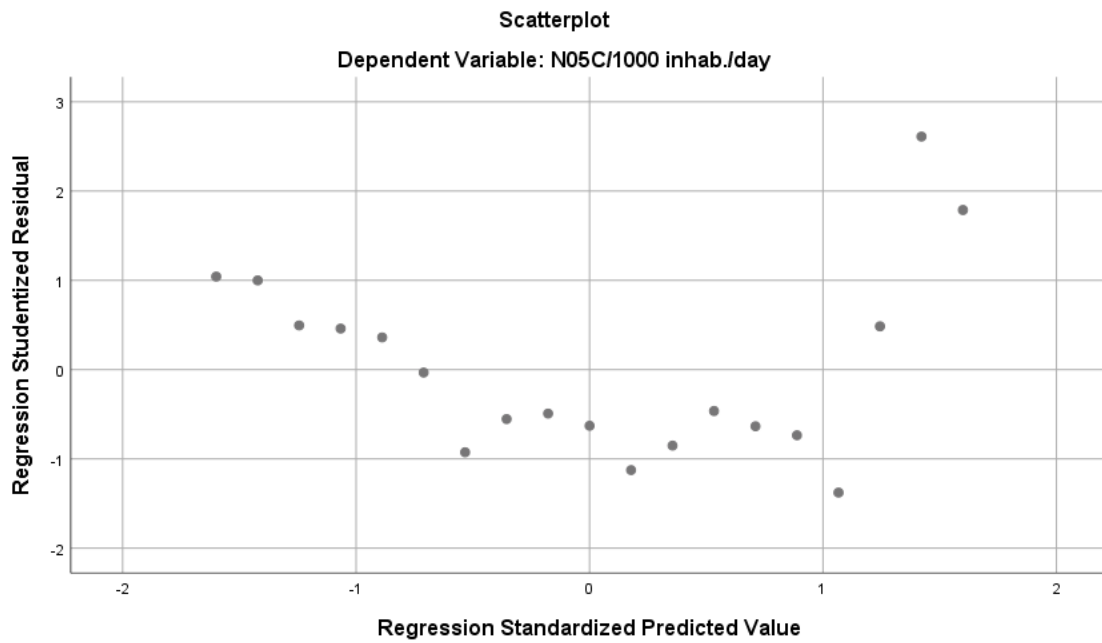

Figure S8. Homocedasticity test output (sresid\*zpred) - N05C.

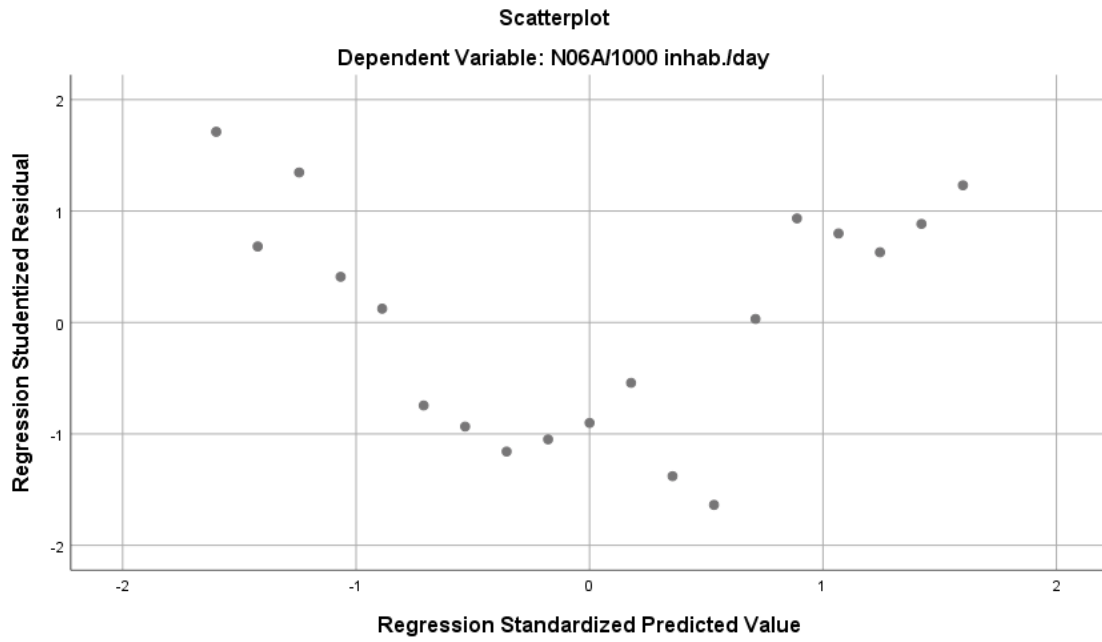

Figure S9. Homocedasticity test output (sresid\*zpred) - N06A

Table S2. Normality tests output (N05B, N05C, and N06A).

|                              | Tests of Normality              |    |       | Shapiro-Wilk |    |      |
|------------------------------|---------------------------------|----|-------|--------------|----|------|
|                              | Kolmogorov-Smirnov <sup>a</sup> |    |       | Statistic    | df | Sig. |
|                              | Statistic                       | df | Sig.  |              |    |      |
| Standardized Residual – N05B | .105                            | 19 | .200* | .962         | 19 | .615 |
| Standardized Residual – N05C | .204                            | 19 | .037  | .922         | 19 | .121 |
| Standardized Residual – N06A | .147                            | 19 | .200* | .936         | 19 | .223 |

\*. This is a lower bound of the true significance.

a. Lilliefors Significance Correction
